# Supplementary material for: Dynamic parent-of-origin effects on small interfering RNA expression in the developing maize endosperm
Source: PubMed Central journal article supplement (PMC4222485; doi:10.1186/s12870-014-0192-8), 2014-07-24

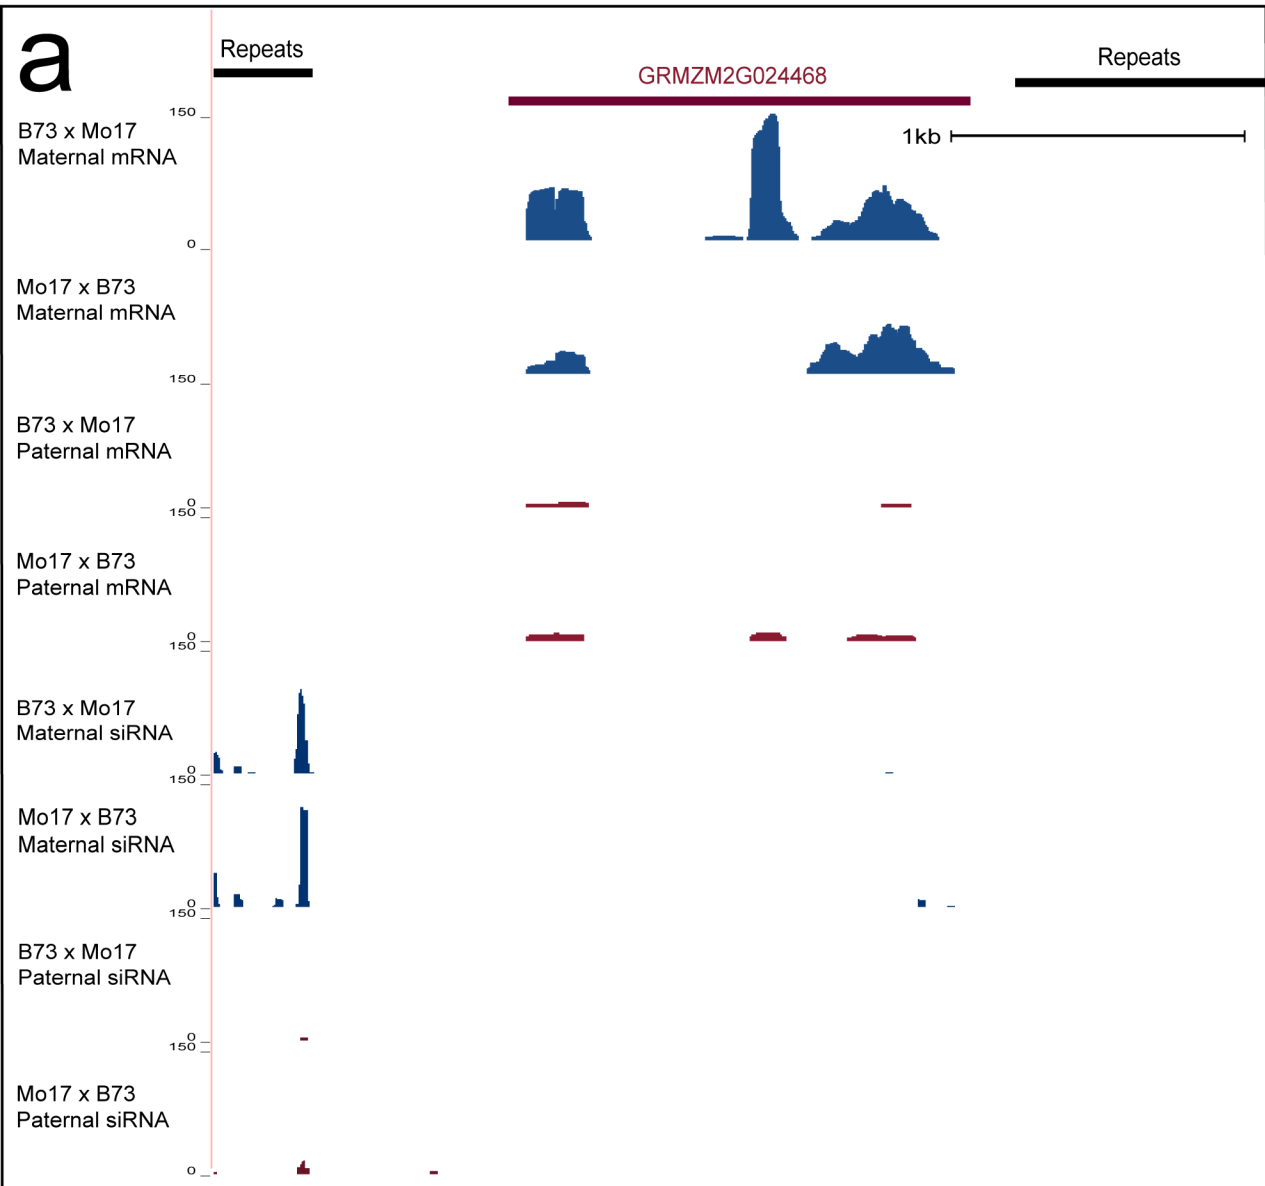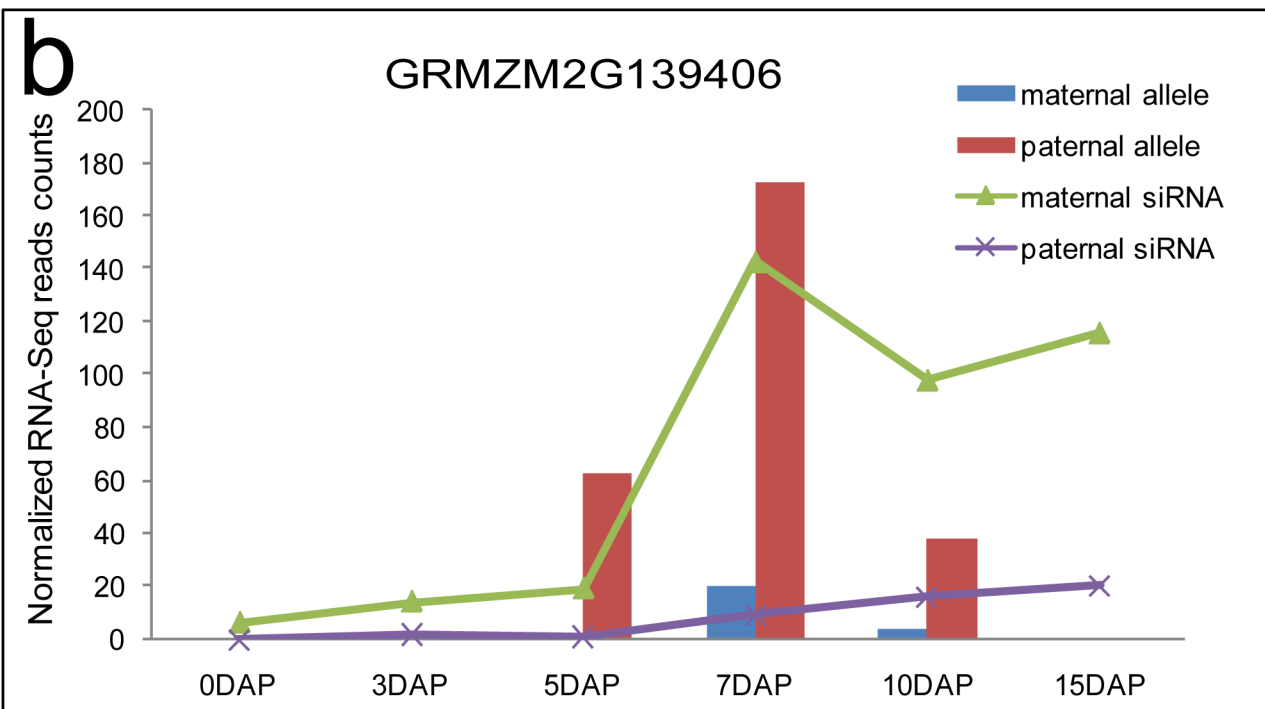

Supplement: s12870-014-0192-8-S6.pdf [file s12870-014-0192-8-S6.pdf]
